# Supplementary material for: Proteomics of the organohalide-respiring Epsilonproteobacterium Sulfurospirillum multivorans adapted to tetrachloroethene and other energy substrates
Source: PubMed Central journal article supplement (PMC4585668; doi:10.1038/srep13794), 2015-09-21
Supplement: srep13794-s1.pdf [file srep13794-s1.pdf]

Supplemental material to:

**Proteomics of the organohalide-respiring  
*Epsilonproteobacterium Sulfurospirillum multivorans*  
adapted to tetrachloroethene and other energy substrates**

Tobias Goris<sup>\*,§,1</sup>, Christian L. Schiffmann<sup>§,2</sup>, Jennifer Gadkari<sup>§,1</sup>, Torsten Schubert<sup>1</sup>, Jana Seifert<sup>3</sup>, Nico Jehmlich<sup>2</sup>, Martin von Bergen<sup>2,4,5</sup> Gabriele Diekert<sup>1</sup>

<sup>§</sup>authors contributed equally

<sup>1</sup>Department of Applied and Ecological Microbiology, Institute of Microbiology, Friedrich Schiller University, 07743 Jena, Germany

<sup>2</sup>Department of Proteomics, Helmholtz Centre for Environmental Research – UFZ, Permoserstr. 15, 04318 Leipzig, Germany

<sup>3</sup>Institute of Animal Science, Hohenheim University, 70593 Stuttgart, Germany

<sup>4</sup>Aalborg University, Department of Biotechnology, Chemistry and Environmental Engineering, Sohngårdsholmsvej 49, 9000 Aalborg, Denmark

<sup>5</sup>Department of Metabolomics, Helmholtz Centre for Environmental Research – UFZ, Permoserstr. 15, 04318 Leipzig, Germany

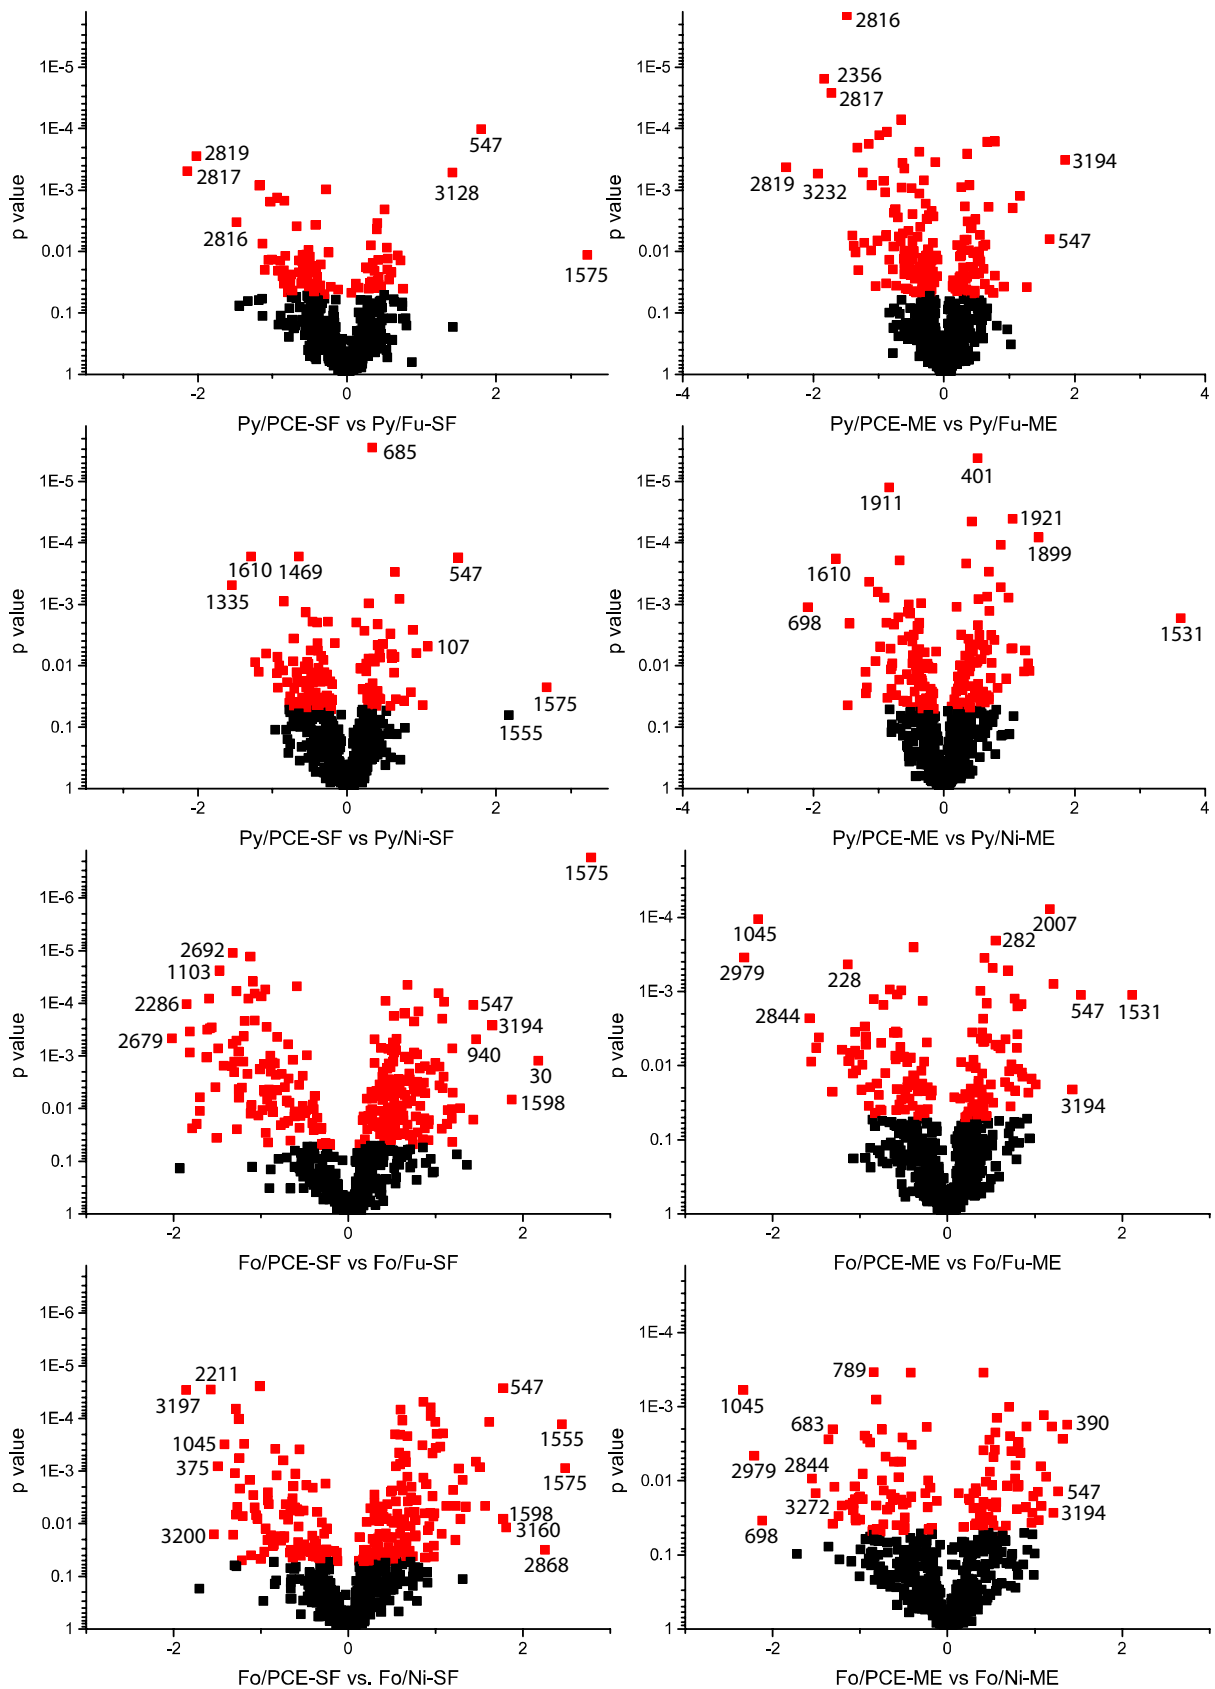

**Fig. S1: Volcano plots for differential comparison of the quantified proteins (Visualization of Table S3).** The x-axis shows the difference in the protein amount as calculated and normalized from the top 3 peptide area (as described in materials and methods). Values are shown as log<sub>10</sub>. A value of more than 0.477 is taken as significant (equals an approximately 3-fold amount). The y-axis shows statistical significance as a result from the T-test. A p-value of less than 0.05 is taken as significant (marked in red). Numbers of the SMUL\_locus tags are given for the proteins with the most significant changes (see Table S3).

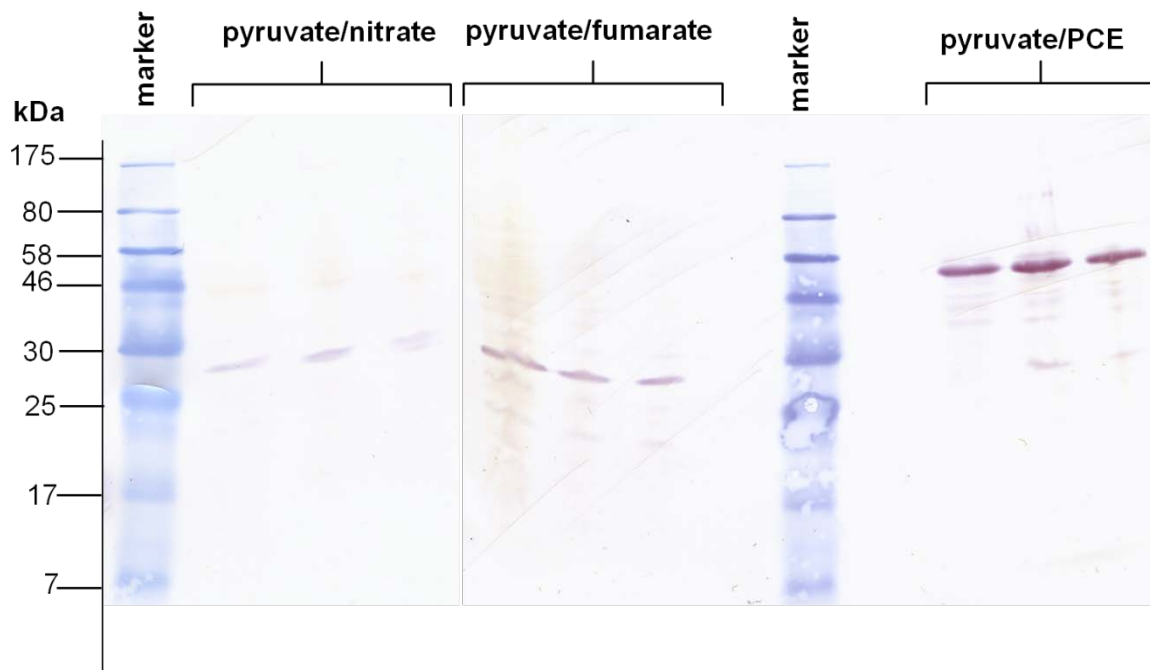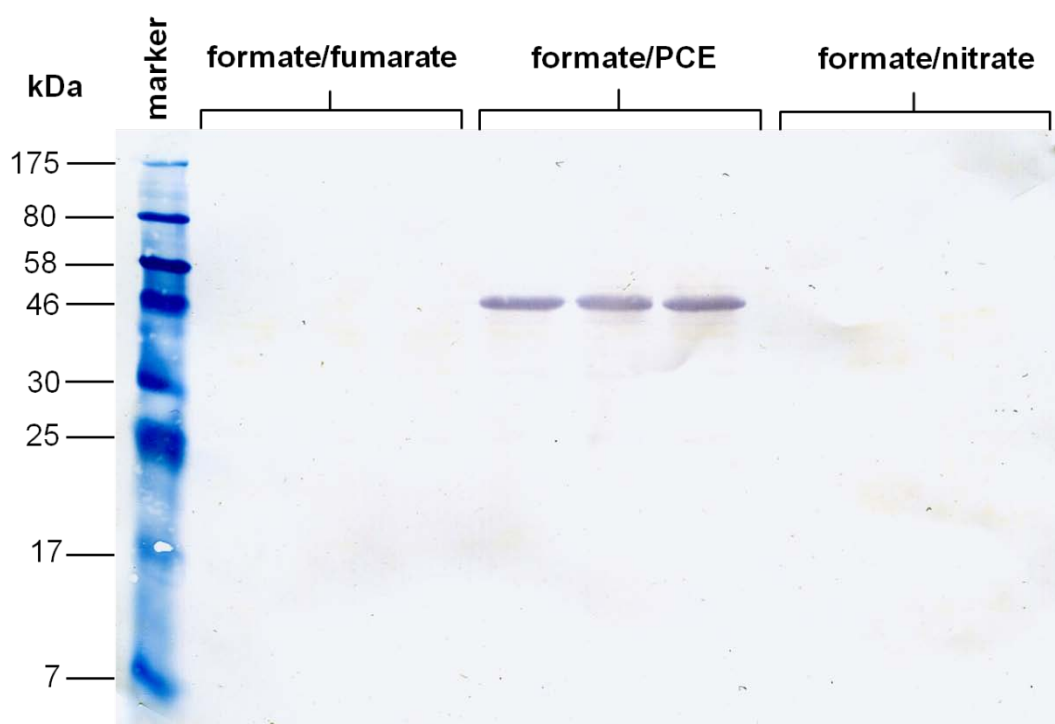

**Fig. S2: Western-Blots: Anti-PceA (1:500.000).** 10  $\mu$ g protein from all biological replicates which were used in the proteome analysis was applied per lane. PceA is visible at approximately 50kDa. The band visible in samples from pyruvate-grown cells without PCE at around 27kDa is an unknown protein product, possibly degraded PceA. Blots were applied to tonal correction.

**Table S5: PceA activity.** The PceA activities were measured photometrically as described in the materials and methods section.

| Sample                   | Volume <sub>sample</sub> [ $\mu$ l] | volume activity<br>[nkat/ ml] | Specific activity<br>[nkat/ ml] | GC-measurement<br>(increase of cDCE) |
|--------------------------|-------------------------------------|-------------------------------|---------------------------------|--------------------------------------|
| <b>Pyruvate/Fumarate</b> | 100                                 | 1,328                         | 0,320                           | -                                    |
| <b>Pyruvate/PCE</b>      | 5                                   | 213,752                       | 20,183                          | ++                                   |
| <b>Pyruvate/Nitrate</b>  | 100                                 | 10,2067                       | 1,180                           | -                                    |
| <b>Formate/Fumarate</b>  | 100                                 | 3,9683                        | 0,4663                          | +                                    |
| <b>Formate/PCE</b>       | 5                                   | 75,9717                       | 20,812                          | ++                                   |
| <b>Formate/Nitrate</b>   | 100                                 | -                             | -                               | -                                    |
